## CORRECTION

# Correction: Association of Childhood Physical and Sexual Abuse with Intimate Partner Violence, Poor General Health and Depressive Symptoms among Pregnant Women

The *PLOS ONE* Staff

[Fig. 1](#) is incorrect. Please view the correct [Fig. 1](#) here.

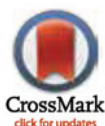

## OPEN ACCESS

**Citation:** The *PLOS ONE* Staff (2015) Correction: Association of Childhood Physical and Sexual Abuse with Intimate Partner Violence, Poor General Health and Depressive Symptoms among Pregnant Women. *PLoS ONE* 10(3): e0122573. doi:10.1371/journal.pone.0122573

**Published:** March 23, 2015

**Copyright:** © 2015 The PLOS ONE Staff. This is an open access article distributed under the terms of the [Creative Commons Attribution License](#), which permits unrestricted use, distribution, and reproduction in any medium, provided the original author and source are credited.

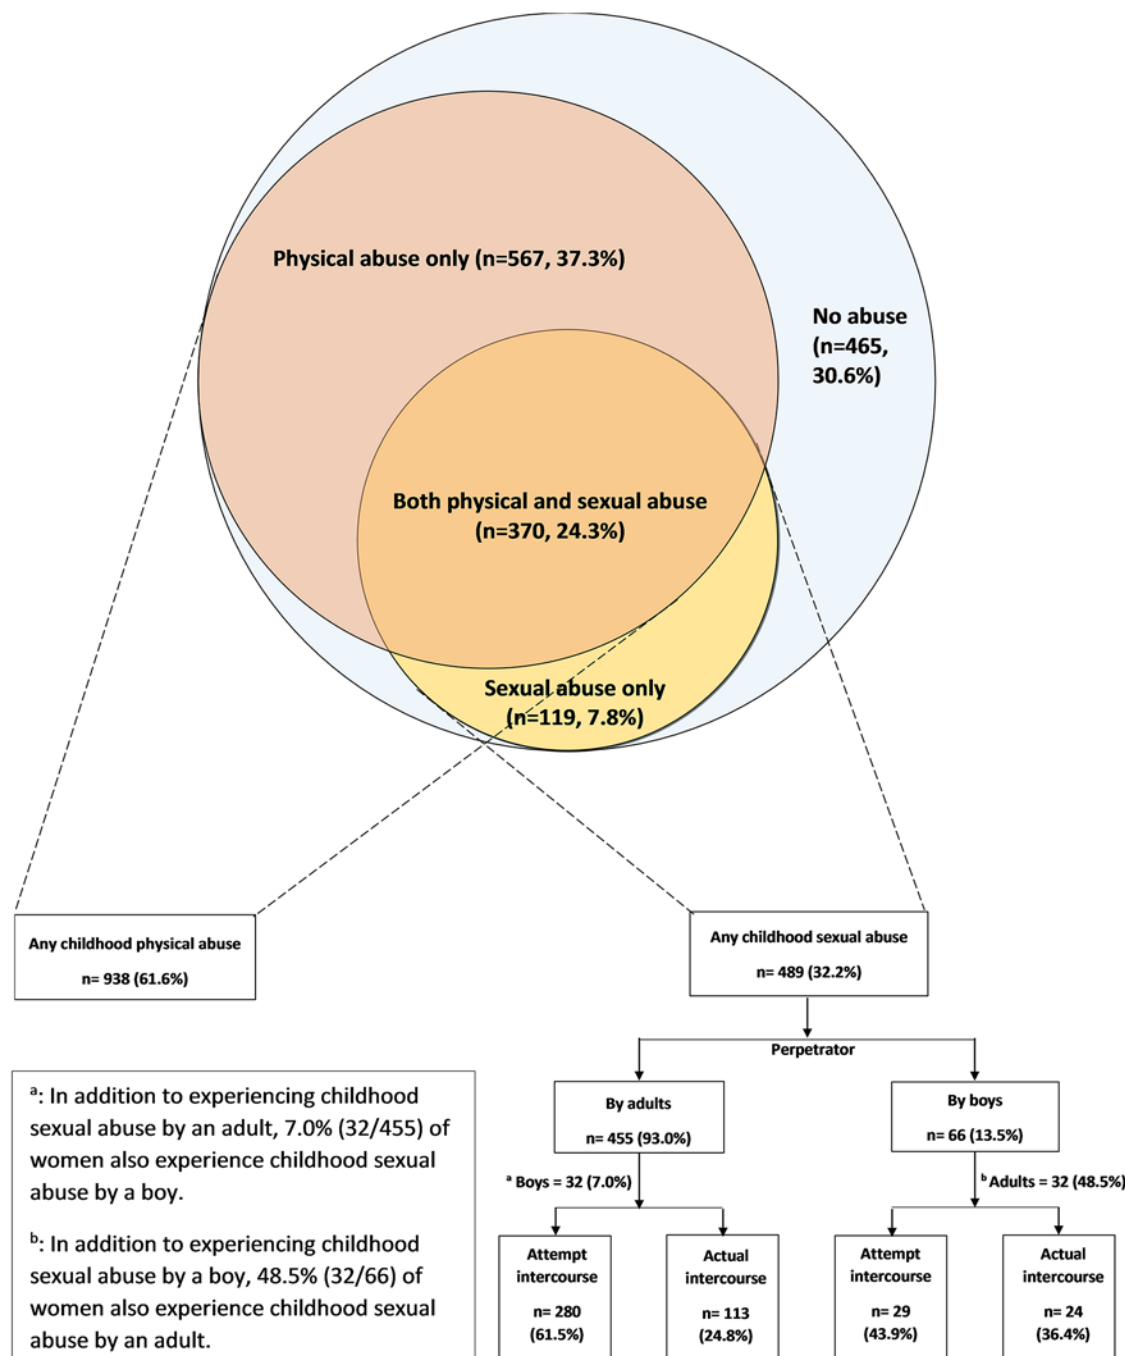

**Fig 1. Prevalence of Childhood Physical and Sexual Abuse by Type and Perpetrators among Pregnant Women in Lima, Peru (N = 1,521).**

doi:10.1371/journal.pone.0122573.g001

## Reference

1. Barrios YV, Gelaye B, Zhong Q, Nicolaidis C, Rondon MB, Garcia PJ, et al. (2015) Association of Childhood Physical and Sexual Abuse with Intimate Partner Violence, Poor General Health and Depressive Symptoms among Pregnant Women. PLoS ONE 10(1): e0116609. doi: [10.1371/journal.pone.0116609](https://doi.org/10.1371/journal.pone.0116609) PMID: [25635902](https://pubmed.ncbi.nlm.nih.gov/25635902/)
